# Supplementary material for: Modulation of afterglow electrochemiluminescence from nitrogen-deficient graphitic carbon nitride by pH
Source: Royal Society of Chemistry journal article supplement (doi:10.1039/d3nj03394e), 2023-01-01
Supplement: d3nj03394e1.pdf [file d3nj03394e1.pdf]

## Supporting Information

### **Modulation of afterglow electrochemiluminescence from nitrogen-deficient graphitic carbon nitride by pH**

Lichan Chen,\* Xuetao Jia, Weiye Zhao, Sixuan Cheng and Shu-Feng Zhou

College of Chemical Engineering, Huaqiao University, Xiamen 361021, China

Email: lchen@hqu.edu.cn

### **Experimental section**

**Chemicals.** Dicyanamide, potassium thiocyanate (KSCN), sodium hydroxide, phosphoric acid and potassium persulfate ( $K_2S_2O_8$ ) were from Sinopharm Chemical Reagent Co., Ltd. (Shanghai, China). All of the other chemicals were of reagent grade and used as received. 2.0 M PBS with different pH was prepared by mixing 2.0 M phosphoric acid and 2.0 M sodium hydroxide aqueous solution, and diluted with water to desired concentration. PBS with different pH containing  $K_2S_2O_8$  was used as the electrolyte in ECL analysis. Ultrapure water, with a resistivity of 18.2 M $\Omega$  (Millipore), was used throughout this work. Dialysis bag with a molecular weight cutoff of 5 kDa was obtained from Viskase.

**Preparation of g-C<sub>3</sub>N<sub>4-x</sub>NS and g-C<sub>3</sub>N<sub>4</sub>NS.** g-C<sub>3</sub>N<sub>4-x</sub>NS and g-C<sub>3</sub>N<sub>4</sub>NS were prepared according to our previous report.<sup>1</sup> Briefly, bulk g-C<sub>3</sub>N<sub>4</sub> was firstly synthesized by heating dicyanamide at 550 °C for 4 h with a heating rate of 2.2 °C/min. Subsequently, bulk g-C<sub>3</sub>N<sub>4-x</sub> was prepared by heating the well-ground mixture of 0.8 g CN and 1.6 g pre-dried KSCN in air first to 400 °C with a heating rate of 10 °C/min for 1 h then to

500 °C with a heating rate of 10 °C/min for 0.5 h. The resulting yellow powder was well ground, dialyzed against water using a dialysis bag and dried at 60 °C in a vacuum. g-C<sub>3</sub>N<sub>4-x</sub> nanosheets (g-C<sub>3</sub>N<sub>4-x</sub>NS) were then fabricated by ultrasonication-mediated exfoliation of bulk g-C<sub>3</sub>N<sub>4-x</sub> in water. 100 mg g-C<sub>3</sub>N<sub>4-x</sub> was dispersed in 30 mL water and ultrasonicated for 2 h. The g-C<sub>3</sub>N<sub>4-x</sub>NS suspension was collected by centrifugation at 5000 rpm, and the concentration of the suspension was then adjusted to 0.5 mg/mL, which was measured by weighting the powder dried from a certain volume of the suspension. g-C<sub>3</sub>N<sub>4</sub>NS was prepared in parallel in the absence of KSCN.

**Apparatus.** Fluorescence spectra were measured on a Japan Hitachi F-4600 spectrometer. UV-vis spectra were collected with a UV-vis spectrophotometer (UV2450). ECL and electrochemical responses of g-C<sub>3</sub>N<sub>4</sub>NS and g-C<sub>3</sub>N<sub>4-x</sub>NS were recorded on an ECL detection system (MPI-E, Remex Electronic Instrument Ltd. Co., Xi'an, China) with a three-electrode system composed of a g-C<sub>3</sub>N<sub>4</sub>NS or g-C<sub>3</sub>N<sub>4-x</sub>NS-modified glassy carbon electrode (GCE, 3 mm in diameter), a Pt wire counter electrode, and an Ag/AgCl (3.0 M) reference electrode. The integral area of the afterglow ECL was calculated using the Origin software peak integration module.

**ECL test.** Prior to electrode modification, GCEs were sequentially polished with 300 and 50 nm alumina powder and then washed ultrasonically in water. The as-polished GCE was coated with 6 μL of g-C<sub>3</sub>N<sub>4</sub>NS or g-C<sub>3</sub>N<sub>4-x</sub>NS with a concentration of 0.5 mg/mL and dried naturally at room temperature to form a semi-transparent film. Electrochemical methods including cyclic voltammetry (CV) and step pulse (SP) were employed for ECL activity investigation. In the case of the CV method, 0.1 M PBS

with different pH containing 1 mM  $K_2S_2O_8$  were used as the electrolyte. In the case of the SP method, 1 M PBS with different pH containing 1 mM  $K_2S_2O_8$  were used as the electrolyte; the potential ( $V_1$ ) and duration ( $t_1$ ) for electron injection from the electrode into  $g-C_3N_{4-x}NS$  were set as -1.0 V and 20 s, respectively, while the potential ( $V_2$ ) and time ( $t_2$ ) for afterglow ECL generation were set as 0 V and 100 s, respectively. The voltage of the photomultiplier tube was set as 800 V.

## Results and discussion

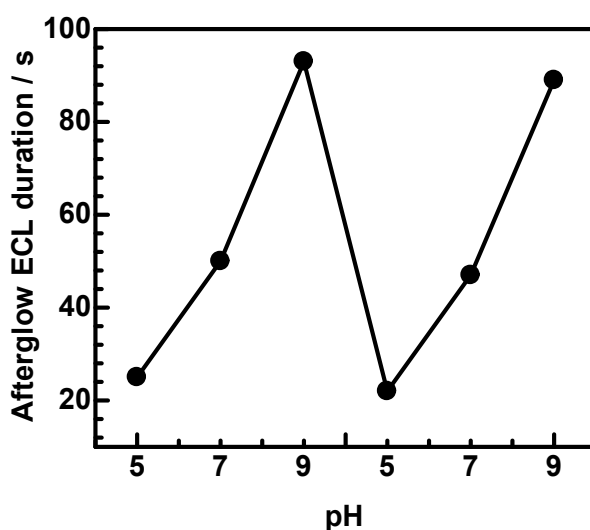

**Figure S1.** The afterglow ECL duration recorded by successive scanning of the  $g-C_3N_{4-x}NS$  modified GCE in 1.0 M PBS with different pH containing 1 mM  $K_2S_2O_8$ . SP parameters:  $V_1 = -1.0$  V,  $t_1 = 20$  s,  $V_2 = 0$  V, and  $t_2 = 100$  s.

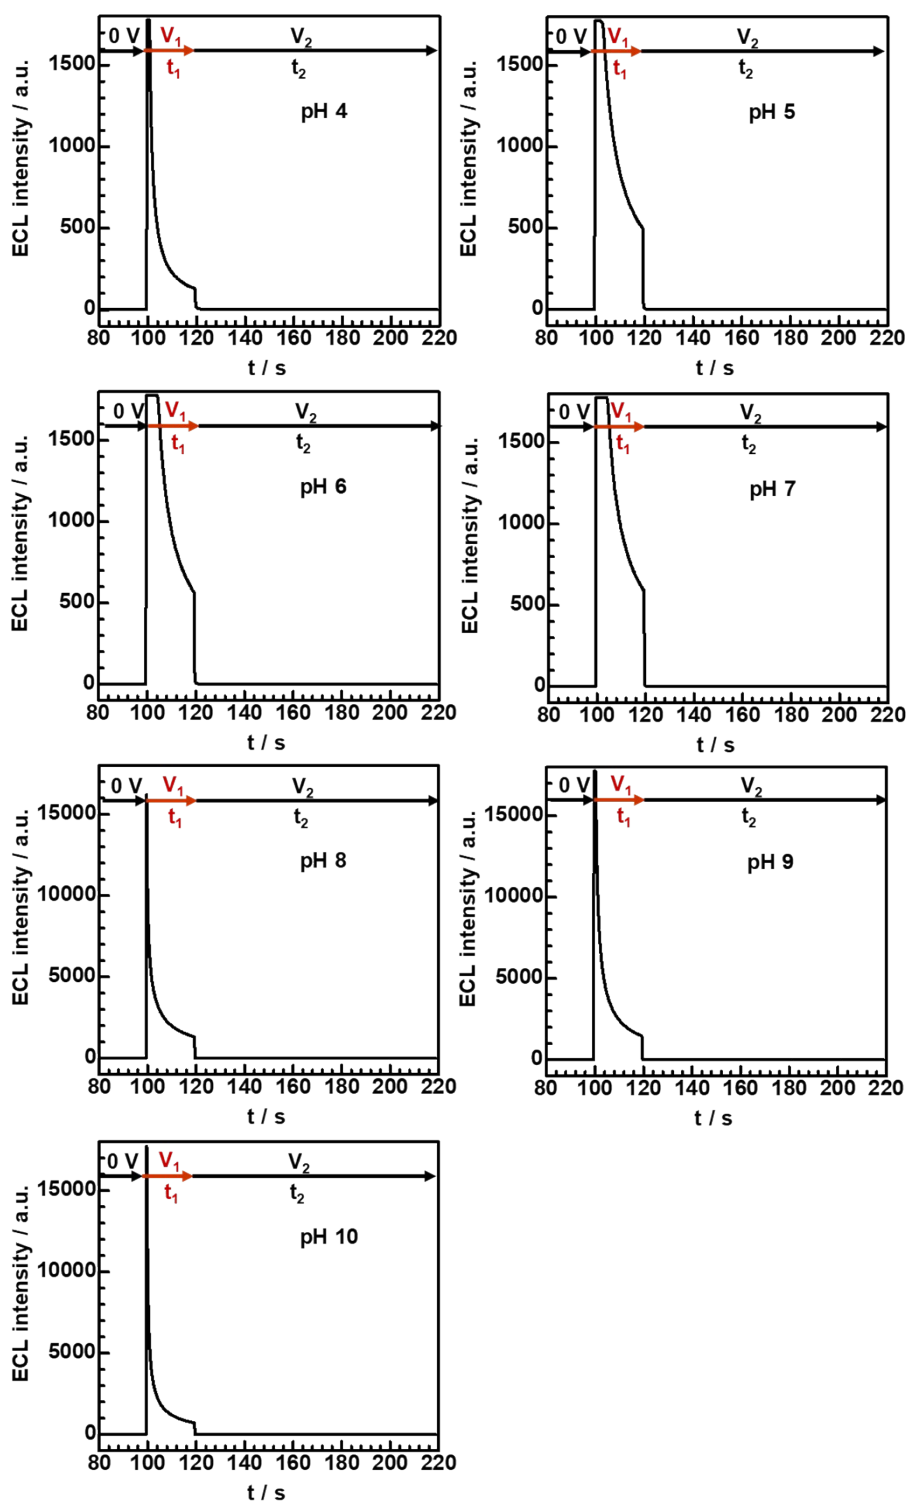

**Figure S2.** Cathodic afterglow ECL emission from  $g\text{-C}_3\text{N}_4\text{NS}$  in 1.0 M PBS with different pH containing 1 mM  $\text{K}_2\text{S}_2\text{O}_8$ . SP parameters:  $V_1 = -1.0$  V,  $t_1 = 20$  s,  $V_2 = 0$  V, and  $t_2 = 100$  s.

## References

1. L. Chen, X. Zhu, J. Wei, L. Tian, C. Hu, X. Xiang and S.-F. Zhou, *Anal Chem*, 2023, **95**, 2917-2924.
